# Supplementary material for: MFG‐E8 Regulates Vascular Smooth Muscle Cell Migration Through Dose‐Dependent Mediation of Actin Polymerization
Source: PubMed Central journal article supplement — J Am Heart Assoc. 2021 May 27;10(11):e020870. doi: 10.1161/JAHA.121.020870 (PMC8483510; doi:10.1161/jaha.121.020870), 2021-05-27
Supplement: JAH3-10-e020870-s001.pdf [file JAH3-10-e020870-s001.pdf]

# **Supplemental Material**

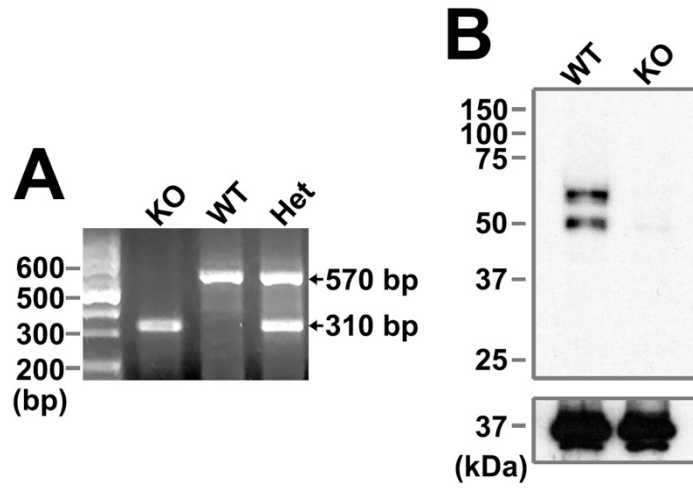

**Figure S1. Characterization of the MFG-E8-knockout (KO) mice.** (A) Genotyping of MFG-E8-KO mice. (B) Western blotting of MFG-E8 expression in the common carotid arteries (CCAs) of wild-type (WT) and MFG-E8-KO mice.

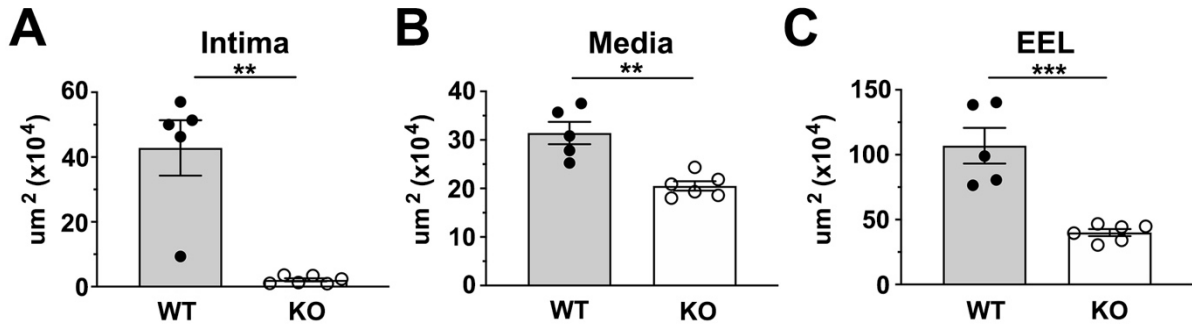

**Figure S2. MFG-E8-knockout (KO) mice exhibit reduced neointimal hyperplasia.**

Paraffin sections of the ligated common carotid arteries (CCAs) of wild-type (WT) and

MFG-E8-KO mice were subjected to Verhoeff–van Gieson staining 21 days after ligation.

Morphometric analyses of the intima (A), media (B), and area bounded by the external elastic

lamina compartment (EEL; C) were conducted. Results are presented as mean  $\pm$  SEM. Each

point is derived from an assessment of three sections of an individual animal. (A) Intima

(WT:  $n_{\text{mice}} = 5$ , MFG-E8-KO:  $n_{\text{mice}} = 6$ ),  $**P < .01$ , as obtained using the nonparametric

Mann–Whitney *U* test. (B) Media (WT:  $n_{\text{mice}} = 5$ , MFG-E8-KO:  $n_{\text{mice}} = 6$ ),  $**P < .01$ , as

obtained using the *t* test. (C) EEL (WT:  $n_{\text{mice}} = 5$ , MFG-E8-KO:  $n_{\text{mice}} = 6$ ),  $***P < .001$ , as

obtained using the *t* test.

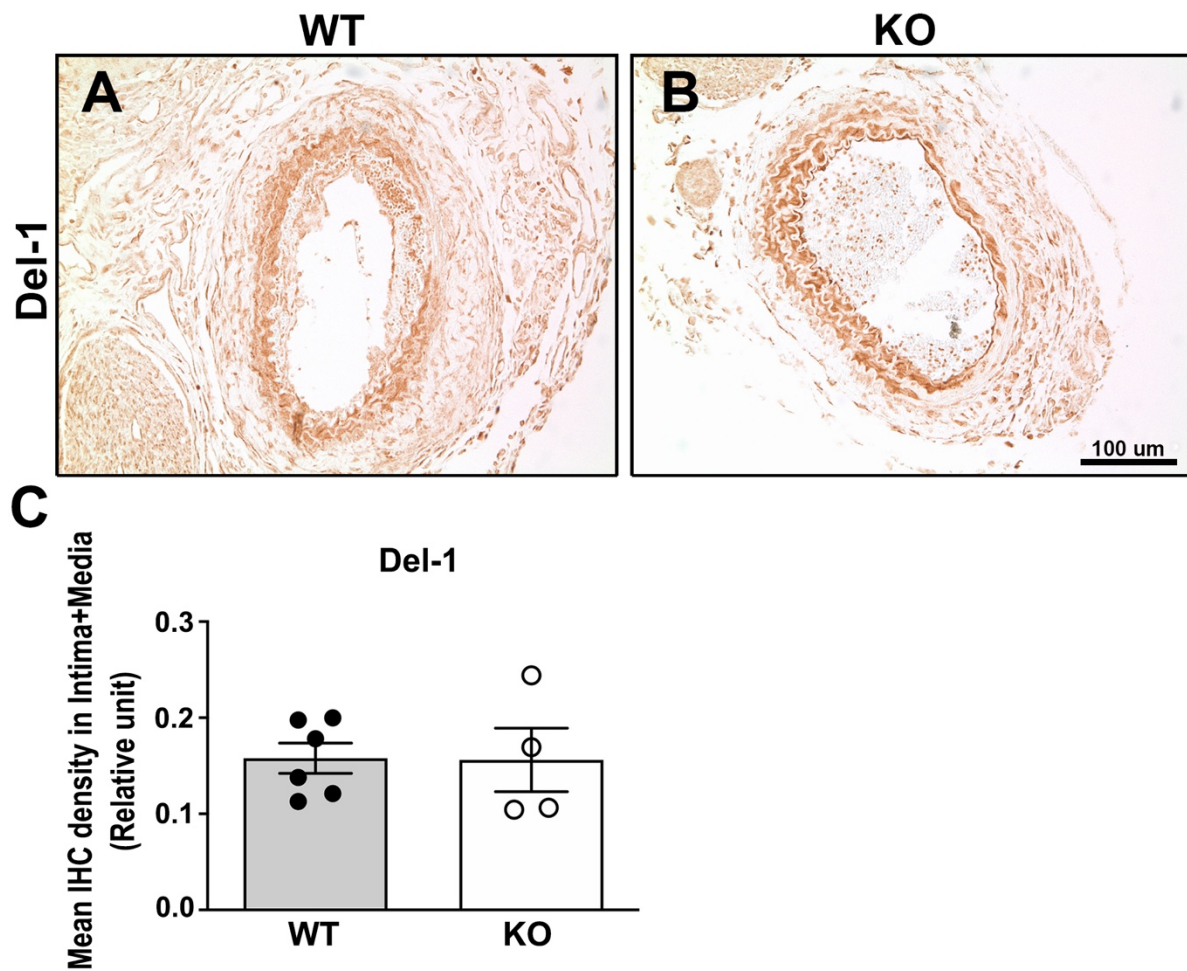

**Figure S3. Expression of developmental endothelial locus-1 (Del-1) is unaffected by the**

**genetic depletion of MFG-E8.** (A) and (B) Immunohistochemistry (IHC) analysis of Del-1

in ligated common carotid arteries (CCAs) at 10 days after surgery. Bar, 100  $\mu$ m. (C)

Quantification of IHC intensity of Del-1 in the intima-media area 10 days after ligation

(wild-type (WT):  $n_{mice} = 6$ , MFG-E8-KO:  $n_{mice} = 4$ ). Results are presented as mean  $\pm$  SEM.

Each point is derived from an assessment of three sections of an individual animal.  $P = .9560$ .

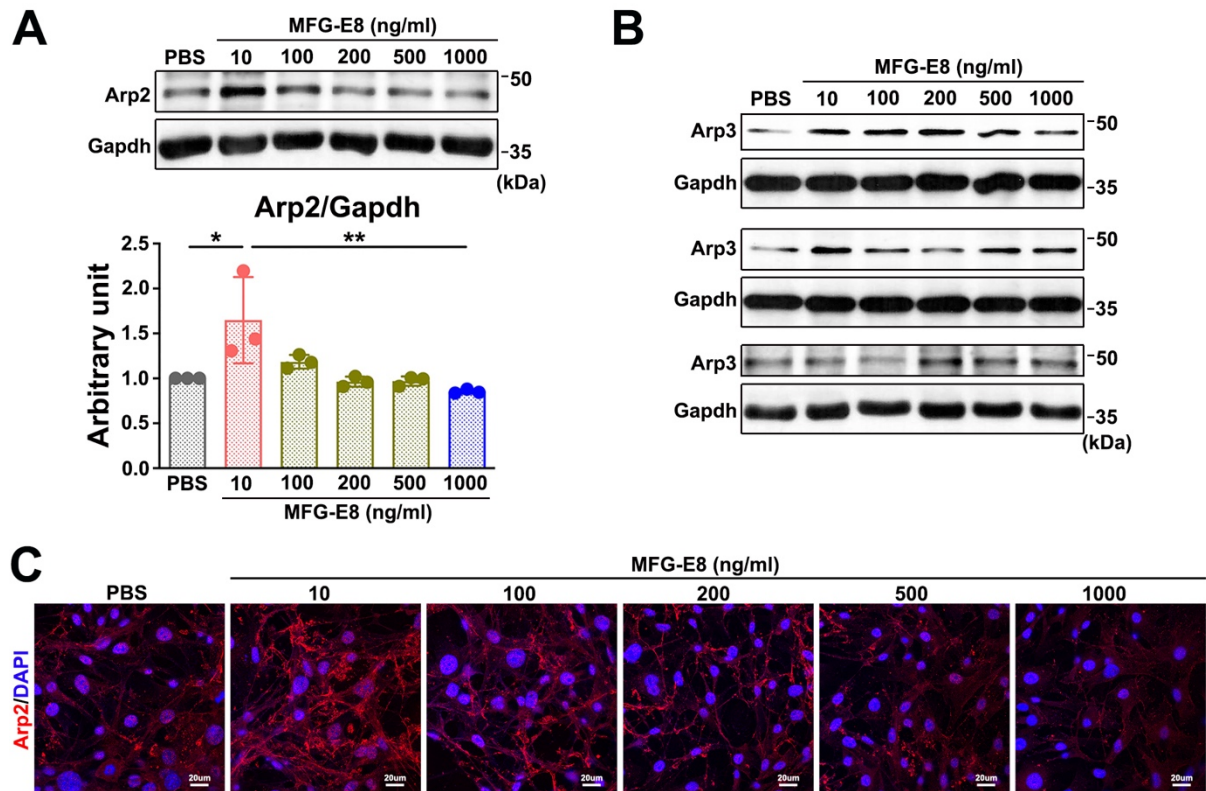

**Figure S4. Biphasic regulation of Arp2 and Arp3 expression in vascular smooth muscle cells (VSMCs) by exogenous MFG-E8.** A10 cells were treated with various doses of recombinant MFG-E8 (rMFG-E8) from 10 to 1000 ng/mL for 16 h. Immunoblotting was conducted to evaluate the protein expression of Arp2 (A) and Arp3 (B) in A10 cells treated with various doses of MFG-E8 for 16 h. Quantitative analyses of Arp2 (A) levels normalized to those of GAPDH were conducted ( $n = 3$ ). Data are presented as mean  $\pm$  SD. Three independent experiments were performed. Each point is derived from each of the three repeated experiments.  $*P < .05$  and  $**P < .01$ , as obtained using one-way ANOVA followed by Tukey's multiple comparisons test. (C) VSMCs isolated from the aortas of wild-type (WT) mice were immunostained with antibodies against Arp2. Bar, 20  $\mu$ m.

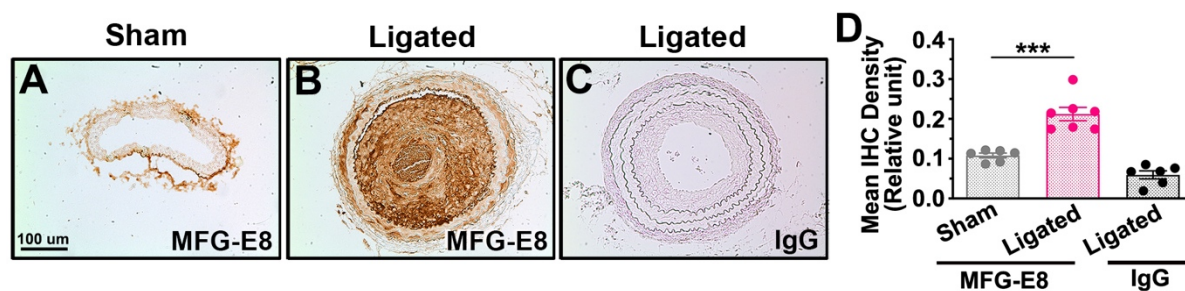

**Figure S5. Ligation injury induces the expression of MFG-E8 in the arterial wall.**

Representative immunohistochemistry (IHC) images of MFG-E8 in the sham-operated (A) and ligated (B) common carotid arteries (CCAs) of wild-type (WT) mice 21 days after ligation. Negative control (IgG) illustrating the absence of immunoreactivity (C). Bar, 100 μm. (D) Immunostaining intensities of MFG-E8 in the intima–media area were assessed 21 days after ligation (sham:  $n_{\text{mice}} = 6$ , ligated:  $n_{\text{mice}} = 7$ , IgG:  $n_{\text{mice}} = 6$ ). Data are presented as mean  $\pm$  SEM. Each point is derived from an assessment of three sections of an individual animal. \*\*\* $P < .001$ , as obtained using the  $t$  test.

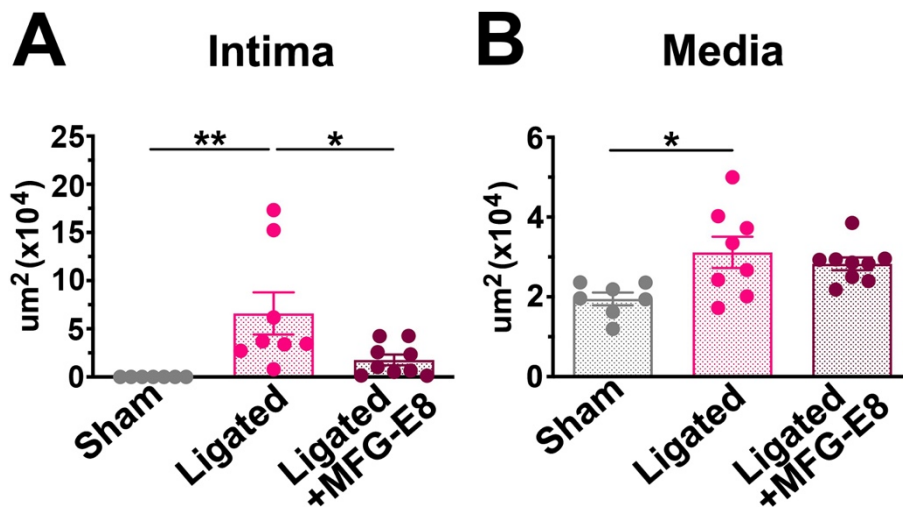

**Figure S6. High-dose MFG-E8 treatment alleviates ligation-induced neointimal hyperplasia.** Paraffin sections of the sham-operated common carotid arteries (CCAs), ligated CCAs, and ligated CCAs with MFG-E8 treatment (2  $\mu\text{g}/\text{mL}$ ) 21 days after ligation were subjected to Verhoeff–van Gieson staining. Morphometric analyses of the intima (A) and media (B) were conducted (sham:  $n = 7$ , ligated:  $n = 8$ , IgG:  $n = 9$ ). Data are presented as mean  $\pm$  SEM.  $*P < .05$  and  $**P < .01$ , as obtained using one-way ANOVA followed by Tukey’s multiple comparisons test.

**Ctrl IgG**

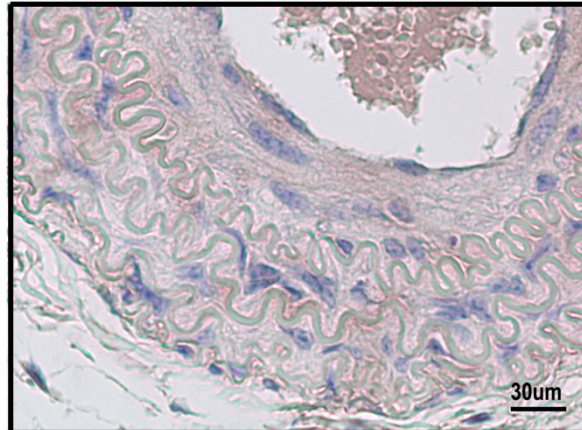

**Figure S7. Negative control for anti-Ki-67 antibody in the intima-media of the vessel 10 days after ligation. Bar, 30  $\mu$ m.**
